# Supplementary material
Source: ML conference proceedings conference paper supplement (https://proceedings.neurips.cc/paper_files/paper/2015/hash/e1696007be4eefb81b1a1d39ce48681b-Abstract.html)
Supplement: Supplementary file [file e1696007be4eefb81b1a1d39ce48681b-Supplemental.zip]

---

# Supplementary Material to Structured Estimation with Atomic Norms: General Bounds and Applications

---

Sheng Chen

Arindam Banerjee

Dept. of Computer Science & Engg., University of Minnesota, Twin Cities  
{shengc, banerjee}@cs.umn.edu

## 1 Proof of Lemma 3

**Statement of Lemma:** Let  $\mathbf{u}^*$  be a solution to the polar operator (11), and define the weighted  $L_1$  semi-norm  $\|\cdot\|_{\mathbf{u}^*}$  as  $\|\mathbf{v}\|_{\mathbf{u}^*} = \sum_{i=1}^p |u_i^*| \cdot |v_i|$ . Then the following relation holds

$$\mathcal{T}_{\mathcal{A}}(\boldsymbol{\theta}^*) \subseteq \mathcal{T}_{\mathbf{u}^*}(\boldsymbol{\theta}^*),$$

where  $\mathcal{T}_{\mathbf{u}^*}(\boldsymbol{\theta}^*) = \text{cone}\{\mathbf{v} \in \mathbb{R}^p \mid \|\boldsymbol{\theta}^* + \mathbf{v}\|_{\mathbf{u}^*} \leq \|\boldsymbol{\theta}^*\|_{\mathbf{u}^*}\}$ .

*Proof:* As both  $\mathcal{T}_{\mathcal{A}}(\boldsymbol{\theta}^*)$  and  $\mathcal{T}_{\mathbf{u}^*}(\boldsymbol{\theta}^*)$  are cones, it is sufficient to show that  $\{\mathbf{v} \mid \|\mathbf{v}\|_{\mathcal{A}} \leq \|\boldsymbol{\theta}^*\|_{\mathcal{A}}\} \subseteq \{\mathbf{v} \mid \|\mathbf{v}\|_{\mathbf{u}^*} \leq \|\boldsymbol{\theta}^*\|_{\mathbf{u}^*}\}$ . Since  $\|\boldsymbol{\theta}^*\|_{\mathbf{u}^*} = \|\boldsymbol{\theta}^*\|_{\mathcal{A}}$ , it also suffices to show that  $\{\mathbf{v} \mid \|\mathbf{v}\|_{\mathcal{A}} \leq 1\} \subseteq \{\mathbf{v} \mid \|\mathbf{v}\|_{\mathbf{u}^*} \leq 1\}$ , i.e., the  $\|\mathbf{v}\|_{\mathcal{A}} \geq \|\mathbf{v}\|_{\mathbf{u}^*}$  for  $\mathbf{v} \in \mathbb{R}^p$ . Using the dual norm definition and sign-change invariance of  $\|\cdot\|_{\mathcal{A}}^*$ , we obtain

$$\|\mathbf{v}\|_{\mathcal{A}} = \sup_{\|\mathbf{a}\|_{\mathcal{A}}^* \leq 1} \langle \mathbf{a}, \mathbf{v} \rangle \geq \langle \text{sign}(\mathbf{v}) \odot |\mathbf{u}^*|, \mathbf{v} \rangle = \langle |\mathbf{u}^*|, |\mathbf{v}| \rangle = \|\mathbf{v}\|_{\mathbf{u}^*},$$

thus  $\mathcal{T}_{\mathcal{A}}(\boldsymbol{\theta}^*) \subseteq \mathcal{T}_{\mathbf{u}^*}(\boldsymbol{\theta}^*)$ . ■

## 2 Proof of Lemma 6

**Statement of Lemma:** Consider a solution  $\mathbf{u}^*$  to (11), which satisfies  $\text{supp}(\mathbf{u}') \subseteq \text{supp}(\mathbf{u}^*)$  for any other solution  $\mathbf{u}'$ . Under the setting of notations in Theorem 4, we define an additional set of coordinates  $\mathcal{P} = \{i \mid u_i^* = 0, \theta_i^* = 0\}$ . Then the tangent cone  $\mathcal{T}_{\mathcal{A}}(\boldsymbol{\theta}^*)$  satisfies

$$\mathcal{T}_1 \oplus \mathcal{T}_2 \subseteq \text{cl}(\mathcal{T}_{\mathcal{A}}(\boldsymbol{\theta}^*)), \quad (\text{S.1})$$

where  $\oplus$  denotes the direct (Minkowski) sum operation,  $\text{cl}(\cdot)$  denotes the closure,  $\mathcal{T}_1 = \{\mathbf{v} \in \mathbb{R}^p \mid v_i = 0 \text{ for } i \notin \mathcal{P}\}$  is a  $|\mathcal{P}|$ -dimensional subspace, and  $\mathcal{T}_2 = \{\mathbf{v} \in \mathbb{R}^p \mid \text{sign}(v_i) = -\text{sign}(\theta_i^*) \text{ for } i \in \text{supp}(\boldsymbol{\theta}^*), v_i = 0 \text{ for } i \notin \text{supp}(\boldsymbol{\theta}^*)\}$  is a  $|\text{supp}(\boldsymbol{\theta}^*)|$ -dimensional orthant.

*Proof:* For any fixed  $\boldsymbol{\theta}^* \in \mathbb{R}^p$  and its  $\mathcal{P}$ , we define a vector sequence  $\{\mathbf{v}^{(k)} = \delta^{(k)} \mathbf{w}\}$  based on a given  $\mathbf{w} \in \mathbb{R}^p$  and a monotonically decreasing positive scalar sequence  $\{\delta^{(k)}\}$  with  $\delta^{(1)} < \min_{i \in \text{supp}(\boldsymbol{\theta}^*)} |\theta_i^*|$  and  $\lim_{k \rightarrow +\infty} \delta^{(k)} = 0$ .  $\mathbf{w}$  satisfies

$$w_i = \begin{cases} 0, & \text{if } i \notin \mathcal{P} \cup \text{supp}(\boldsymbol{\theta}^*) \\ -\text{sign}(\theta_i^*), & \text{if } i \in \text{supp}(\boldsymbol{\theta}^*) \\ \text{arbitrary}, & \text{if } i \in \mathcal{P} \end{cases}.$$

Let  $\mathbf{u}^{(k)}$  be one solution to the polar operator for  $\boldsymbol{\theta}^* + \mathbf{v}^{(k)}$ , and form another sequence  $\{\mathbf{u}^{(k)}\}$ . Note that  $\text{sign}(\theta_i^* + v_i^{(k)}) = \text{sign}(\theta_i^* - \text{sign}(\theta_i^*)\delta^{(k)}) = \text{sign}(\theta_i^*) = \text{sign}(u_i^{(k)})$  for  $i \in \text{supp}(\boldsymbol{\theta}^*)$ .

Then we have

$$\begin{aligned} \|\theta^* + \mathbf{v}^{(k)}\|_{\mathcal{A}} - \|\theta^*\|_{\mathcal{A}} &\leq \langle \theta^* + \mathbf{v}^{(k)}, \mathbf{u}^{(k)} \rangle - \langle \theta^*, \mathbf{u}^{(k)} \rangle = \langle \mathbf{v}^{(k)}, \mathbf{u}^{(k)} \rangle \\ &\leq -\delta^{(k)} \|\mathbf{u}_{\text{supp}(\theta^*)}^{(k)}\|_1 + \delta^{(k)} \langle \mathbf{w}_{\mathcal{P}}, \mathbf{u}_{\mathcal{P}}^{(k)} \rangle \leq -\delta^{(k)} (\|\mathbf{u}_{\text{supp}(\theta^*)}^{(k)}\|_1 - \|\mathbf{w}_{\mathcal{P}}\|_{\infty} \|\mathbf{u}_{\mathcal{P}}^{(k)}\|_1) \end{aligned}$$

As  $\delta^{(k)}$  approaches 0,  $\theta^* + \mathbf{v}^{(k)}$  converges to  $\theta^*$ , and a subsequence  $\{\mathbf{u}^{(k_i)}\}$  of  $\{\mathbf{u}^{(k)}\}$  will converge to a solution  $\mathbf{u}'$  to the polar operator for  $\theta^*$ . Hence  $\lim_{i \rightarrow +\infty} \|\mathbf{u}_{\text{supp}(\theta^*)}^{(k_i)}\|_1 = \|\mathbf{u}'_{\text{supp}(\theta^*)}\|_1 > 0$ ,  $\lim_{i \rightarrow +\infty} \|\mathbf{u}_{\mathcal{P}}^{(k_i)}\|_1 = \|\mathbf{u}'_{\mathcal{P}}\|_1 = 0$ , and for large enough  $k_i$ , we have

$$\|\theta^* + \mathbf{v}^{(k_i)}\|_{\mathcal{A}} - \|\theta^*\|_{\mathcal{A}} \leq -\delta^{(k_i)} (\|\mathbf{u}_{\text{supp}(\theta^*)}^{(k_i)}\|_1 - \|\mathbf{w}_{\mathcal{P}}\|_{\infty} \|\mathbf{u}_{\mathcal{P}}^{(k_i)}\|_1) \leq 0,$$

thus  $\mathbf{v}^{(k_i)}$  belongs to  $\mathcal{T}_{\mathcal{A}}(\theta^*)$ . Since  $\mathbf{v}^{(k)} = \delta^{(k)} \mathbf{w}$ ,  $\mathbf{w}$  also belongs to  $\mathcal{T}_{\mathcal{A}}(\theta^*)$ .

Now we show  $\mathcal{T}_1 \subseteq \text{cl}(\mathcal{T}_{\mathcal{A}}(\theta^*))$ . For any  $\mathbf{a} \in \mathcal{T}_1 = \{\mathbf{v} \in \mathbb{R}^p \mid v_i = 0 \text{ for } i \notin \mathcal{P}\}$  and arbitrarily small  $\xi > 0$ , we construct  $\mathbf{w}$  such that  $w_i = \frac{a_i}{\xi}$  for  $i \in \mathcal{P}$ . Based on the argument above, this  $\mathbf{w}$  is in  $\mathcal{T}_{\mathcal{A}}(\theta^*)$ . Therefore  $\mathbf{a}' \triangleq \xi \mathbf{w} \in \mathcal{T}_{\mathcal{A}}(\theta^*)$ , and  $\|\mathbf{a} - \mathbf{a}'\|_2 \leq \sqrt{|\text{supp}(\theta^*)|} \xi$ , which can be arbitrarily close to 0. Therefore taking the closure of  $\mathcal{T}_{\mathcal{A}}(\theta^*)$  gives us  $\mathcal{T}_1 \subseteq \text{cl}(\mathcal{T}_{\mathcal{A}}(\theta^*))$ .

Next we show  $\mathcal{T}_2 \subseteq \mathcal{T}_{\mathcal{A}}(\theta^*)$ . For any coordinate  $i \in \text{supp}(\theta^*)$ , construct  $\mathbf{v} \in \mathbb{R}^p$  such that  $v_i = -\theta_i^*$  and  $v_j = 0$  for  $j \neq i$ , and  $\theta' \in \mathbb{R}^p$  such that  $\theta'_i = -\theta_i^*$  and  $\theta'_j = \theta_j^*$  for  $j \neq i$ . As the norm  $\|\cdot\|_{\mathcal{A}}$  is invariant under sign-changes, we can verify that

$$\|\theta^* + \mathbf{v}\|_{\mathcal{A}} = \left\| \frac{\theta^* + \theta'}{2} \right\|_{\mathcal{A}} \leq \frac{1}{2} \|\theta^*\|_{\mathcal{A}} + \frac{1}{2} \|\theta'\|_{\mathcal{A}} = \|\theta^*\|_{\mathcal{A}}.$$

Thus  $\mathbf{v} \in \mathcal{T}_{\mathcal{A}}(\theta^*)$ . Repeat the construction of  $\mathbf{v}$  for each  $i \in \text{supp}(\theta^*)$ , and then the conic combination of these  $\mathbf{v}$ 's forms  $\mathcal{T}_2$ . Therefore we have  $\mathcal{T}_2 \subseteq \mathcal{T}_{\mathcal{A}}(\theta^*)$ , which together with  $\mathcal{T}_1 \subseteq \text{cl}(\mathcal{T}_{\mathcal{A}}(\theta^*))$  implies  $\mathcal{T}_1 \oplus \mathcal{T}_2 \subseteq \text{cl}(\mathcal{T}_{\mathcal{A}}(\theta^*))$ .  $\blacksquare$

### 3 Proof of Theorem 8

**Statement of Theorem:** For a given  $\theta^*$ , Algorithm 1 returns a solution to polar operator (11) for  $\|\cdot\|_k^{sp*}$ .

*Proof:* The polar operator for 2- $k$  symmetric gauge norm is essentially

$$\mathbf{u}^* = \text{argmax} \langle \mathbf{u}, \theta^* \rangle \quad \text{s.t.} \quad \|\mathbf{u}^*\|_{(k)} \leq 1.$$

As 2- $k$  symmetric gauge norm is sign and permutation invariant,  $\mathbf{u}^*$  should conform with the sign and order of  $\theta^*$  in order to achieve maxima, i.e.,  $\langle \mathbf{u}^*, \theta^* \rangle \leq \langle |\mathbf{u}^*|^{\downarrow}, |\theta^*|^{\downarrow} \rangle$ . W.l.o.g, we assume  $\theta^* = |\theta^*|^{\downarrow} \triangleq \mathbf{z}$ . Now we analyze the structure of the solution  $\mathbf{u}^*$ , whose entries should be nonnegative and sorted in descending order. Assume that  $u_k^*$  takes certain fixed but unknown value  $\beta$ . It is easy to see that the entries in  $\mathbf{u}_{k+1:p}^*$  can take the value of  $\beta$ , as it will always maximize  $\langle \mathbf{u}_{k+1:p}^*, \theta_{k+1:p}^* \rangle$  without violating the constraint  $\|\mathbf{u}^*\|_{(k)} \leq 1$ . Generally we also assume that  $\mathbf{u}_{i:k}^*$  take the value of  $\beta$  and  $u_{i-1}^* > u_i^*$ . Then the maximization problem becomes

$$\begin{aligned} &\max_{\mathbf{u}_{1:i-1}, \beta} \langle \mathbf{u}_{1:i-1}, \mathbf{z}_{1:i-1} \rangle + \beta \|\mathbf{z}_{i:p}\|_1 \\ \text{s.t.} \quad &\|\mathbf{u}_{1:i-1}\|_2^2 \leq 1 - (k - i + 1)\beta^2, \quad u_j > \beta \text{ for } 1 \leq j < i. \end{aligned}$$

Then we let  $\mathbf{w} = \mathbf{u}_{1:i-1}$  and introduce the Lagrange multiplier  $\boldsymbol{\lambda} \in \mathbb{R}^{i-1}$  and  $\alpha \in \mathbb{R}$ . Using strong duality, we have the equivalent problem

$$\min_{\boldsymbol{\lambda} \geq \mathbf{0}, \alpha \geq 0} \max_{\beta, \mathbf{w}} \langle \mathbf{w}, \mathbf{z}_{1:i-1} \rangle + \beta \|\mathbf{z}_{i:p}\|_1 + \langle \boldsymbol{\lambda}, \mathbf{w} - \mathbf{b} \rangle - \alpha((k - i + 1)\beta^2 + \|\mathbf{w}\|_2^2 - 1),$$

where  $\mathbf{b} = [\beta, \beta, \dots, \beta]^T \in \mathbb{R}^{i-1}$ . By complementary slackness, we know  $\boldsymbol{\lambda} = \mathbf{0}$  for the optimal solution if it is feasible. Taking the gradient of the objective function w.r.t  $\beta$  and  $\mathbf{w}$ , we obtain

$$\|\mathbf{z}_{i:p}\|_1 - \sum_i \lambda_i - 2\alpha\beta(k - i + 1) = \|\mathbf{z}_{i:p}\|_1 - 2\alpha\beta(k - i + 1) = 0 \quad (\text{S.2})$$

$$\mathbf{z}_{1:i-1} + \lambda - 2\alpha \mathbf{w} = \mathbf{z}_{1:i-1} - 2\alpha \mathbf{w} = 0. \quad (\text{S.3})$$

It is also not difficult to see that the optimal solution will make the constraint  $\|\mathbf{u}_{1:i-1}\|_2^2 \leq 1 - (k - i + 1)\beta^2$  hold with equality, i.e.,

$$\|\mathbf{w}\|_2^2 = 1 - (k - i + 1)\beta^2 \quad (\text{S.4})$$

Combining the Equation (S.2) (S.3) (S.4), we solve  $\beta$  and  $\alpha$  and  $\mathbf{w}$

$$\beta = \frac{\|\mathbf{z}_{i:p}\|_1}{\sqrt{\|\mathbf{z}_{i:p}\|_1^2(k - i + 1) + \|\mathbf{z}_{1:i-1}\|_2^2(k - i + 1)^2}}, \quad \alpha = \frac{\|\mathbf{z}_{1:i-1}\|_2}{2\sqrt{1 - (k - i + 1)\beta^2}}, \quad \mathbf{w} = \frac{\mathbf{z}_{1:i-1}}{2\alpha},$$

which is essentially the Line 3 in Algorithm 1. As we do not know the  $i$  beforehand, we have to check every possible  $1 \leq i \leq k$  to find the one that achieves the maxima without violating the constraint, which corresponds to the loop and if-then statement in Algorithm 1. Since the optimal  $\mathbf{w}$  is proportional to  $\mathbf{z}_{1:i-1}$ , which is sorted in descending order, we only need to ensure  $\beta < w_{i-1}$ . ■

## 4 Proof of Theorem 9

**Statement of Theorem:** For given  $s$ -sparse  $\theta^* \in \mathbb{R}^p$ , the Gaussian width  $w(\mathcal{C}_k^{sp}(\theta^*))$  and the restricted norm compatibility  $\Psi_k^{sp}(\theta^*)$  for a specified  $k$  are given by

$$w(\mathcal{C}_k^{sp}(\theta^*)) \leq \begin{cases} \sqrt{p}, & \text{if } s < k \\ \sqrt{\frac{3}{2}s + \frac{2\theta_{\max}^{*2}}{\theta_{\min}^{*2}} s \log\left(\frac{p}{s}\right)}, & \text{if } s = k \\ \sqrt{\frac{3}{2}s + \frac{2\kappa_{\max}^2}{\kappa_{\min}^2} s \log\left(\frac{p}{s}\right)}, & \text{if } s > k \end{cases}, \quad \Psi_k^{sp}(\theta^*) \leq \begin{cases} \sqrt{\frac{2p}{k}}, & \text{if } s < k \\ \sqrt{2}\left(1 + \frac{\theta_{\max}^*}{\theta_{\min}^*}\right), & \text{if } s = k \\ \left(1 + \frac{\kappa_{\max}}{\kappa_{\min}}\right)\sqrt{\frac{2s}{k}}, & \text{if } s > k \end{cases}, \quad (\text{S.5})$$

where  $\theta_{\max}^* = \max_{i \in \text{supp}(\theta^*)} |\theta_i^*|$  and  $\theta_{\min}^* = \min_{i \in \text{supp}(\theta^*)} |\theta_i^*|$ .

*Proof:* For  $s < k$ , we note that  $\|\theta^*\|_k^{sp} = \|\theta^*\|_2$ , and  $\mathbf{u}^*$  can be obtained in a closed-form  $\mathbf{u}^* = \frac{\theta^*}{\|\theta^*\|_2}$ . Applying Theorem 4, we find that the set  $\mathcal{R}$  is empty, and thus the Gaussian width  $w(\mathcal{C}_k^{sp}(\theta^*)) = \sqrt{p}$ . For  $s = k$ ,  $\mathbf{u}^*$  is in closed-form as well,

$$u_i^* = \begin{cases} \frac{\theta_i^*}{\|\theta^*\|_2}, & \text{if } i \in \text{supp}(\theta^*) \\ \frac{\theta_{\min}^*}{\|\theta^*\|_2}, & \text{if otherwise} \end{cases}.$$

In this case,  $\mathcal{Q}$  is empty,  $\mathcal{R}$  is nonempty, and  $|\mathcal{S}| = s = k$ . Hence Theorem 4 implies the corresponding Gaussian width, and  $\frac{\kappa_{\max}}{\kappa_{\min}} = \frac{\theta_{\max}^*}{\theta_{\min}^*}$ . For  $s > k$ , the closed-form solution is generally unavailable, but we can see from Algorithm 1 that  $\beta$  should be nonzero, thus  $\mathcal{Q}$  is empty and  $\mathcal{R}$  is nonempty, which gives us the corresponding Gaussian width.

Given the fact that  $\|\cdot\|_k^{sp} \leq \sqrt{2} \max\{\|\cdot\|_2, \frac{\|\cdot\|_1}{\sqrt{k}}\}$  shown in [1], we can choose  $\beta_1 = \sqrt{\frac{2}{k}}$  and  $\beta_2 = \sqrt{2}$ . Base on the analysis above, the restricted norm compatibility for  $s \geq k$  directly follows Theorem 5. For  $s < k$ , we need to compute the unrestricted norm compatibility  $\Phi$ . As  $\|\cdot\|_k^{sp} < \sqrt{2} \max\{\|\cdot\|_2, \frac{\|\cdot\|_1}{\sqrt{k}}\}$ , we have

$$\Phi = \sup_{\mathbf{u} \in \mathbb{R}^p} \frac{\|\mathbf{u}\|_k^{sp}}{\|\mathbf{u}\|_2} \leq \sup_{\mathbf{u} \in \mathbb{R}^p} \frac{\sqrt{2} \max\{\|\mathbf{u}\|_2, \frac{\|\mathbf{u}\|_1}{\sqrt{k}}\}}{\|\mathbf{u}\|_2} \leq \max\{\sqrt{2}, \sqrt{\frac{2p}{k}}\} = \sqrt{\frac{2p}{k}},$$

in which we use the inequality  $\|\cdot\|_1 \leq \sqrt{p}\|\cdot\|_2$ . ■

## References

- [1] A. Argyriou, R. Foygel, and N. Srebro. Sparse prediction with the  $k$ -support norm. In *Advances in Neural Information Processing Systems (NIPS)*, 2012.
